1        **Comprehensive functional screening of taste sensation *in vivo***

2

3

Jisoo Han<sup>1,2</sup>, Myunghwan Choi<sup>1,2\*</sup>

4

5

6    <sup>1</sup>Department of Biomedical Engineering, Sungkyunkwan University, Suwon 16419, Republic  
7    of Korea. <sup>2</sup>Center for Neuroscience Imaging Research, Institute for Basic Science, Suwon  
8    16419, Republic of Korea.

9

10

11

12    \* Correspondence to:

13        M. Mark Choi, Ph.D.

14        Assistant Professor

15        Department of Biomedical Engineering, Sungkyunkwan University

16        Center for Neuroscience Imaging Research, Institute for Basic Science

17        Address: 2066 Seobu-ro, Jangan-gu, Suwon, South Korea (16419)

18        Tel: +82-31-299-4358

19        Email: photomodulation@gmail.com

1 **ABSTRACT**

2

3 The initial event in taste sensation is mediated by taste cells on the tongue that translate  
4 ingested chemicals into cellular signals. Current understanding on this cellular level taste  
5 encoding process has relied on *ex vivo* model systems that cannot fully recapitulate natural  
6 cellular microenvironment *in vivo*. To resolve this methodological limitation, we invented a  
7 microfluidics-on-a-tongue imaging chamber that has integrated multichannel microfluidics for  
8 auto-controlled tastant delivery. Using this system, we screened over 100 fungiform taste  
9 cells to the five basic taste qualities, and obtained comprehensive functional maps. We  
10 revealed that taste cells are composed of 70% of single-tuned and 30% of dual-tuned cells,  
11 and also discovered a novel population of dual-tuned taste cells encoding a positive valence.  
12 We believe that our novel screening platform will pave a way for the deeper understanding of  
13 taste coding logic.

14

15 *Keywords: taste, calcium, imaging, microfluidics, screening*

## 1 INTRODUCTION

2 Taste is fundamental to life, as it guides the intake of nutritious contents and the avoidance  
3 of toxic chemicals in foods (Lindemann, 2001). In mammals, the foremost sensor is taste  
4 cells on the tongue that convert ingested chemicals into cellular activity (Chaudhari and  
5 Roper, 2010). The cellular information is subsequently conveyed to the central nervous  
6 system (Finger, 2005). The understanding of this encoding-decoding process is one of the  
7 fundamental questions in the field of taste (Liman et al., 2014; Roper and Chaudhari, 2017).

8 There has been decades of studies on how taste information is encoded into taste  
9 cells using various tools such as electrophysiology (Yoshida et al., 2010), genetics  
10 (Chandrashekar et al., 2006; Lee et al., 2017; Ohmoto et al., 2013), and microscopy  
11 (Chandrashekar et al., 2010; Dvoryanchikov et al., 2011; Oka et al., 2013; Tomchik et al.,  
12 2007). However, all of these existing tools inevitably involve invasive sample preparations for  
13 measuring functional activities of taste cells: digestion of extracellular matrices  
14 (Chandrashekar et al., 2010), isolation of individual taste cells or buds (Yoshida et al., 2006),  
15 and incubation in artificial environments. Evidently, these *ex vivo* model systems cannot fully  
16 recreate the native cellular microenvironment. For example, the physiological protective  
17 barriers formed at intercellular junctions are degraded (Holland, V.F., Zampighi, G.A., Simon,  
18 1991), blood perfusion mediating endocrine signaling is lost (Wu et al., 2015), and feedback  
19 signals from afferent nerve fibers are lost (Vandenbeuch and Kinnamon, 2016).  
20 Consequently, the *ex vivo* condition severely interferes with the reliable functional screening  
21 of multiple tastants requiring hours of observation. The first imaging window for observing  
22 taste cells in a living mouse has previously been reported, but it lacked critical functionalities  
23 such as stable real-time imaging and controlled tastant delivery (Choi et al., 2015).

24 Here, we report a novel image-based screening platform, named “microfluidics-on-a-  
25 tongue” that enables high-throughput functional screening of taste cells *in vivo*. By  
26 introducing the microfluidics-based tastant delivery and ratiometric calcium imaging, this  
27 system provides unprecedented reliable real-time activity of taste cells in their native  
28 environment. We exploited this platform to demonstrate a comprehensive *in vivo* screening  
29 of the five basic tastes (sweet, umami, salty, sour and bitter) in over 100 taste cells. Through  
30 this screening, we reveal novel populations of taste cells that are tuned to dual taste qualities.

31

32

## 33 RESULTS

### 34 System design and validation

35 The microfluidics-on-a-tongue system was designed to provide stable microscopic imaging  
36 of the dorsal surface of the anterior tongue (i.e., fungiform taste bud) while controllably

1 delivering multiple liquid-phase tastants (Fig. 1). The main device was custom-made with  
2 stainless steel to provide mechanical rigidity in a small form factor, as well as provide  
3 corrosion resistance for long-term usage. The device is composed of two units, the top and  
4 bottom units that sandwich the mouse tongue to stabilize the physiological motions caused  
5 by the heartbeat and breathing (Fig. 1a,b; Supplementary Fig. 1). The bottom unit holds the  
6 externalized tongue by chemically gluing the ventral part while the top unit is placed at an  
7 adjustable height of  $\sim 1.5$  mm from the bottom unit to gently stabilize the tongue  
8 (Supplementary Fig. 2). To enable cellular-level imaging, the top unit contains an optical  
9 window made with a circular cover slip. An opening of 3 mm in diameter covers nearly half of  
10 the anterior tongue. This window size is compatible with an uninterrupted high-NA volumetric  
11 imaging of the taste buds lying  $\sim 0.8$  mm from the surface of the device (Fig. 1c)  
12 (Beaurepaire and Mertz, 2002). In addition, the top unit integrates a spindle-shaped  
13 microfluidic channel for the controlled delivery of multiple liquid-phase tastants. The input  
14 port is connected to an 8-channel micro-manifold that is fed by a computer-controlled  
15 perfusion system. In our initial trials, we observed that the fluid flow generates severe tissue  
16 motions, especially while switching the fluidic input channels. To stabilize the flow, we  
17 connected the output port to a syringe pump, clamping the fluid drainage at a fixed flow rate  
18 of  $300 \mu\text{l}\cdot\text{min}^{-1}$ . By balancing the input and output flow rates, we could obtain a stable quasi-  
19 steady-state flow. In addition, we introduced a transparent porous membrane (pore size = 30  
20  $\mu\text{m}$ ) at the interface of the tongue and the microfluidic channel to minimize the effect of fluid  
21 shear stress. In the control trials with four channels filled with artificial saliva, we obtained  
22 microscopic stability even while switching abruptly between input channels (Supplementary  
23 Fig. 3).

24 After establishing the stabilized condition, we characterized the fluidic parameters that  
25 determine the kinetics of taste stimuli to the taste cells. To achieve this, we alternated  
26 between fluidic input channels filled with either control or fluorescent artificial saliva, while  
27 performing real-time microscopy on the apical surface of the taste bud (Fig. 1d). The infusion  
28 and washout kinetics followed one-phase exponential curves with a time constant of  
29  $8.53 \pm 1.6$  s. The latency between switching on a channel and the arrival of the tastant to the  
30 taste bud was  $6.49 \pm 0.29$  s. Based on this information, we designed the parameters for  
31 tastant delivery and analyzed the functional data, as described in Online Methods.

32 When tested with various physiologic tastants, however, we noted a critical issue  
33 caused by the difference in the refractive indices of the solutions (Supplementary Table 1).  
34 Artificial saliva has a refractive index close to water (1.333) but the additional solutes in the  
35 taste solutions proportionally increase the refractive index (Supplementary Fig. 4). For  
36 example, an umami solution prepared with 100 mM MPG has a higher refractive index of  
37 1.336 ( $\Delta n = 0.003$ ) that introduces considerable optical aberrations, and thus artefactual

1 signals. This optical noise often overwhelms fluorescent calcium imaging that typically  
2 depends on a small change in fluorescence intensity ( $\Delta F/F \approx 1\text{--}10\%$ ). To resolve this issue,  
3 we adopted a ratiometric calcium imaging that quantifies the relative change in calcium-  
4 sensitive dye to calcium-insensitive dye (Fig. 1e) (Nguyen et al., 2016; Thestrup et al., 2014).  
5 We chose calcium-green dextran (CGD) for the calcium-sensitive dye and cascade blue (CB)  
6 for the calcium-insensitive dye due to their anionic charge, two-photon efficiency, and  
7 minimal spectral overlap. To our surprise, the ratiometric approach cleanly resolved the  
8 refractive index issue because the optical aberration affects the fluorescence intensities of  
9 both dyes to the same degree. Furthermore, it effectively suppressed system-level optical  
10 noises such as laser power drift that is typically  $\pm 0.5\%$  in optical intensity, leading to  $\pm 1\%$   
11 noise increase in two-photon fluorescence (Supplementary Fig. 4).

12 Finally, we investigated if physiological blood perfusion to the taste bud is maintained  
13 in our preparation (Supplementary Fig. 5). To measure the blood flow, we intravenously  
14 administered a fluorescent dextran and traced negatively-stained blood cells in the  
15 capillaries surrounding the taste bud (Shih et al., 2012). By measuring the blood flow while  
16 adjusting the height of the top unit, we revealed that compressive strain of over 35% on the  
17 tongue near-completely ceases the blood flow. As the ischemic condition often leads to  
18 irreversible calcium response or inactive state of taste cells (Szydlowska and Tymianski,  
19 2010), we set the compressive strain to be less than 10% and confirmed that blood flow was  
20 intact before every imaging session.

21

## 22 **Comprehensive functional screening**

23 Having validated the system, we examined how taste cells are tuned to different taste  
24 qualities. We exposed a series of tastants at physiological concentrations to the tongue with  
25 intervals of 4 min while performing serial two-photon imaging of the taste bud at  $\sim 6$  Hz. For  
26 each taste cell, the intensity trace for calcium-sensitive dye was divided by that for calcium-  
27 insensitive dye, and the resulting ratiometric trace denoted as the relative change to the  
28 baseline ( $\Delta F/F$ ). In this protocol, the responsive cells showed robust activation through  
29 repeated stimulations (Fig. 2a,b). For each taste bud, we typically screened 4-8 stained taste  
30 cells (lower and upper quartiles) to the five basic tastes, with 4 repeated stimuli for each  
31 taste quality (Fig. 2c). Cells were classified as responsive to the taste quality if statistically  
32 significant positive responses were observed in sync with the tastant delivery. We presented  
33 the spatial profile of the cellular responses into a taste map for each taste bud (Fig. 2d). In  
34 total, we screened 101 cells in 17 taste buds ( $n = 17$  mice).

35 In the screening data, we observed that  $\sim 70\%$  of fungiform taste cells were tuned to a  
36 single taste quality, supporting the labeled line model that each taste quality is encoded by  
37 separate taste cells (Fig. 3a) (Yarmolinsky et al., 2009). In single-tuned cells, the cell

1 population for each taste quality was unevenly distributed: 30% salty, 28% bitter, 24% sweet,  
2 11% sour, and 7% umami. Interestingly, we observed two “bitter taste buds” (out of 17 taste  
3 buds) composed of over 85% of bitter-responding cells (Supplementary Fig. 6). Other than  
4 the two bitter taste buds, we did not observe notable topographical clustering of functional  
5 cell types within a taste bud.

6 Yet, ~30% of taste cells were tuned to multiple taste qualities, mostly to dual taste  
7 qualities (Fig. 3b). Among 10 possible combinations ( ${}^5C_2$ ) of dual-tuned responses  
8 (Chandrashekar et al., 2010), we discovered that only several well-defined modes of inter-  
9 taste crosstalk exists (Fig. 3c). Notably, there was strong coupling between sweet and  
10 umami, the two appetitive taste qualities. Although recent studies have reported the sweet-  
11 umami crosstalk at the level of downstream afferent neurons (Barretto et al., 2015; Wu et al.,  
12 2015), our finding provides the first direct evidence of the functional crosstalk present in  
13 peripheral taste cells. We also discovered that salty tastes exhibit functional connections to  
14 all other basic tastes, either preferred (sweet and umami) or aversive (bitter and sour) tastes.  
15 This result may be attributed to the unique bimodal behavior of salty taste – preferred at low  
16 concentrations (<150 mM) but avoided at high concentrations (>300 mM) (Chandrashekar et  
17 al., 2010).

18

### 19 **Verification of sweet-umami cells**

20 We further investigated the molecular mechanism of the sweet-umami cells responding to  
21 the two different taste qualities. Sweet and umami taste receptors are formed by hetero-  
22 dimerization of the three T1R family: T1R2/T1R3 for sweet and T1R1/T1R3 for umami (Zhao  
23 et al., 2003). Therefore, we hypothesized that these cells may express all the three T1R  
24 gene family to be responsive to both sweet and umami taste qualities. Previous studies on  
25 this issue resulted in controversial outcomes presumably because only two mRNAs were  
26 detected for each tissue section (Kim et al., 2003; Nelson et al., 2001). To clear this  
27 controversy, we performed 3-color fluorescent *in situ* hybridization (T1R1, T1R2 and T1R3)  
28 on lingual slices with single-molecular sensitivity and counted the single-mRNAs for each  
29 fungiform taste cell (Fig. 4) (Wang et al., 2012). To reliably demarcate individual taste cells,  
30 we counter-stained the nuclei with DAPI and took a differential-interference contrast (DIC)  
31 image (Fig. 4a,b). Consistent with our functional screening data, we discovered that ~10% of  
32 taste cells transcribe all the three T1R gene family that are potentially sweet-umami cells  
33 (Fig. 4c,d).

34

35

36

## 1 DISCUSSION

2 We have reported a novel microfluidics-on-a-tongue platform that offers reliable functional  
3 imaging of fungiform taste cells in their native living state, for the first time. Harnessing this  
4 platform, we comprehensively screened ~100 taste cells to the five basic taste qualities, and  
5 obtained functional classification of the taste cells, composed of 70% of single-tuned and 30%  
6 of dual-tuned cells. We further discovered that the fungiform taste bud contains ~10% of  
7 sweet-umami cells, potentially encoding a positive valence.

8 Our *in vivo* screening result may resolve long-standing controversies on the breadth of  
9 tuning at the taste bud. Previous studies performed *ex vivo* resulted in controversial  
10 outcomes. Several studies reported predominant multi-tuned cells responding to up to five  
11 different taste qualities (Caicedo et al., 2002; Tomchik et al., 2007), while other studies  
12 reported mostly single-tuned cells with minimal crosstalk (Chandrashekar et al., 2006). Our  
13 comprehensive screening clarifies that there exist ~70% of single-tuned cells and ~30% of  
14 dual-tuned cells and the dual-tuned cells exhibit well-defined modes of crosstalk, composed  
15 of sweet-umami and salty-others. The previously reported crosstalk between high salt and  
16 aversive taste qualities (i.e., bitter and sour) were also found within the modes of the  
17 crosstalk we observed, suggesting the validity of our findings (Oka et al., 2013).

18 Interestingly, our screening result on taste cells bears resemblance with recent *in vivo*  
19 studies on geniculate neurons that relay taste information from the fungiform taste bud to the  
20 brain (Barretto et al., 2015; Wu et al., 2015). First, we revealed that a novel population of  
21 taste cells that respond to both sweet and umami comprises ~10% of the total population.  
22 Similarly, geniculate neurons showed that 3–11% of the total population responds to both  
23 sweet and umami. Moreover, ~45% of geniculate neurons that responded to umami also  
24 responded to sweet. This also agrees well with our result on taste cells (~47%). These  
25 sweet-umami neurons were previously conceived as a convergence of taste information  
26 from distinct sweet and umami taste cells but our finding provides an alternative possibility  
27 that convergence of sweet and umami (conversely, positive valence) occurs at the earliest  
28 taste encoding process (Barretto et al., 2015). The gustatory cortex consistently encodes the  
29 sweet and umami in closely apposed cortical fields (Chen et al., 2011), and a behavioral  
30 assay based on conditioned taste aversion demonstrated considerable cross-generalization  
31 between the two appetitive taste qualities (Heyer et al., 2004). Furthermore, our finding that  
32 salty taste is connected to all other taste qualities was also observed in the geniculate  
33 ganglion. This may be attributed to the unique bimodal behavior of salty taste: preferred at  
34 lower concentrations (<150 mM) but avoided at higher concentrations (>300 mM). The  
35 moderate saltiness used in our screening (~250 mM) might have evoked both preferred (i.e.,  
36 sweet and umami) and aversive (i.e., bitter and sour) pathways (Chandrashekar et al., 2010;

1 Oka et al., 2013). By contrast, bitter-sour crosstalk that is the most prevalent in geniculate  
2 neurons was nearly unobserved in the taste bud. This result suggests that convergence of  
3 bitter and sour may arise at the neuronal level. This is consistent with the finding that bitter-  
4 sour neurons receive input from bitter T2R-expressing cells (Barretto et al., 2015). We  
5 envision that detailed comparative analysis of the screening data along the taste  
6 transduction pathway will offer better understanding of information processing on tastes  
7 (Dando and Roper, 2009; Huang et al., 2009; Roper, 2006).

8 From a technical standpoint, our screening platform can be improved further. Although  
9 the ratiometric approach provided effective correction of imaging artifacts, it could not correct  
10 the large axial motion in the focal plane ( $>3 \mu\text{m}$ ) caused by high-index tastants ( $n > 1.34$ ) or  
11 the non-rigid tissue motion caused by sour tastes. We also noted that the pH change  
12 induced by sour tastants could affect the absorbance or quantum yield of fluorophores.  
13 Although our current protocol showed cellular calcium response greater than the artifact,  
14 studies on strong acids may require pH-insensitive fluorophores. In addition, the  
15 electrophoretic loading of fluorophores can affect cellular functionalities. We indeed  
16 observed that voltage levels higher than 2 Vpp could be cytotoxic. Introducing transgenic  
17 animals with a genetic calcium indicator (e.g., GCaMPs) in the taste cells would provide an  
18 effective solution to this issue and further enable cell-type specific labeling. Finally, two-  
19 photon microscopy based on point scanning only captures a small fraction of information  
20 from the specimen restricted to a focal plane within a single taste bud. Advanced volumetric  
21 scanning systems can capture more spatiotemporal information including axially propagating  
22 intracellular calcium signals (Bouchard et al., 2015; Song et al., 2017). Random access  
23 scanning with ultrafast acoustic-optic scanners would enable the imaging of multiple taste  
24 buds in a single trial for attaining higher throughputs screening (Katona et al., 2012).

25 The microfluidics-on-a-tongue platform is broadly applicable to other areas of studies  
26 on the tongue. This platform may provide quantitative representation of tastes that have only  
27 been communicated with subjective description. Taste quantification will have a huge impact  
28 on the food industry by enabling objective information transfer between the industry and their  
29 customers. There is also increasing interest on drug-taste interaction, as taste change is one  
30 of the most common side effects of drugs (Clark et al., 2012). Screening of functional  
31 changes by drugs offers a reliable quantification of drug-taste interaction. Similar screening  
32 can be utilized to find taste modulatory compounds to enhance preferred tastes or inhibit  
33 avoided ones (Zuker, 2015). Homeostatic maintenance of taste cells and age-related change  
34 in taste sensation are also interesting fields that can benefit from our technique (Lee et al.,  
35 2017).

36



## 1 MATERIALS AND METHODS

2

3 **Animal.** Male mice aged 8–12 weeks C57BL/6 (Orient Bio) were used for this research. All  
4 animal experiments were performed in compliance with institutional guidelines and approved  
5 by the subcommittee for research animal care at Sungkyunkwan University.

6

7 **Mouse preparation.** Mixture of 0.12 mg/g zoletil (Virbac) and 0.01 mg/g rompun (Bayer  
8 Korea) was intraperitoneally injected for mice anesthesia. 2.5% w/v TRITC-dextran (500kDa,  
9 Sigma Aldrich) in phosphate-buffered saline (Life technologies) was injected intravenously  
10 for blood flow imaging. To reduce movement artifact, the animal skull was fixed;  
11 approximately 1 cm<sup>2</sup> of the skin of the mouse was removed and periosteum wiped out using  
12 cotton swab. A metal rod ~3.9 mm in diameter and ~20 mm in length was attached to the  
13 mouse skull with dental glue (DENTKIST, South Korea). This rod was tied up to a surgical  
14 board using Epoxy putty (PSI, Polymeric System, INC). Afterwards, the mouse tongue was  
15 softly drawn using a plastic tweezer. The ventral part of the tongue and lower lip were glued  
16 with instant medical adhesive (Loctite 4161, Henkel Corporation) to the bottom unit of the  
17 fluidic device for immobility. The exposed surface of the mouse tongue was preserved under  
18 wet conditions with artificial saliva.

19

20 **Electroporation.** Electrophoretic bulk loading was performed for taste cell staining 12-36 h  
21 before the experiment using Calcium Green-1 dextran, CGD (3,000 kDa, Invitrogen) and  
22 cascade blue dextran, GB (3,000 kDa, Invitrogen). Both dyes were introduced for ratiometric  
23 analysis since CGD is calcium-sensitive and GB is calcium-insensitive. The anesthetized  
24 mouse tongue was drawn out of the mouth using a pair of blunt plastic forceps. Optical lens  
25 paper (7 by 7 mm<sup>2</sup>) was steeped in 5 % w/v CGD and 2.5 % w/v CB with 7:3 volumetric ratio  
26 and placed on the anterior surface of the mouse tongue. The tongue was then sandwiched  
27 between electrical tweezers, 5 mm in diameter (Tweezertrode, Harvard Apparatus). Electric  
28 pulses (voltage: 2 Vpp, frequency: 1 Hz, pulse width: 100 ms, duration: 50–100 s) from a  
29 function generator (KEYSIGHT TECHNOLOGIES, 33220A) was used for electrophoresis  
30 (Choi et al., 2015).

31

32 **Solutions.** Artificial saliva (2 mM NaCl, 5 mM KCl, 3 mM NaHCO<sub>3</sub>, 3 mM KHCO<sub>3</sub>, 0.25 mM  
33 CaCl<sub>2</sub>, 0.25 mM MgCl<sub>2</sub>, 0.12 mM K<sub>2</sub>HPO<sub>4</sub>, 0.12 mM KH<sub>2</sub>PO<sub>4</sub>, 1.8 mM HCl, pH7) (Danilova,  
34 2003) was used as control state for taste cells and washing out after tastant stimulation. The  
35 following were tastants used in this study: Bitter (mixture of 2.5–5 mM quinine, 2.5–5 mM  
36 denatonium and 10–20 μM cycloheximide), Sweet (40 mM AceK), Sour (10 mM Citric Acid),

1 Salty (100 mM low sodium, 250 mM or 400 mM high sodium), Umami (mixture of 100 mM  
2 MPG and 1  $\mu$ M IMP).

3

4 **Stabilization of the microfluidics-on-a-tongue device.** Liquid delivery was controlled  
5 using a pressure controller and its software (Octaflow II, ALA Scientific). Suction syringe was  
6 connected to prevent perturbation caused by switching channels. Typically 0.4 psi for 8-  
7 channel input and 300  $\mu$ l $\cdot$ min<sup>-1</sup> for discharge output was applied to establish the steady-state  
8 condition. A stabilized “microfluidic-on-a-tongue-device” was then placed on the surface of  
9 the mice tongue. Both ends of the device were screwed tight to prevent fluidic turbulence or  
10 physiological movement. Curved washers were inserted between the upper and bottom units  
11 to protect the tongue from damage due overpressure.

12

13 **Calcium imaging.** After the preparation, the mouse was moved to the stage under a two-  
14 photon microscope. A heating pad was used for maintaining body temperature. The anterior  
15 part of the tongue was exposed to the chamber opening while artificial saliva was constantly  
16 supplied to the taste buds and/or cells. Each session was composed of 20 s stimulation and  
17 4 min washing with artificial saliva. During each session, taste cell calcium imaging was  
18 captured for about 60-80 s to avoid photo toxicity. A water immersion objective (16X, NA 0.80,  
19 Nikon or 20 X, NA 0.92 Leica) was equipped with a two-photon microscope body (Bruker),  
20 with 800–810 nm wavelength used for the two-photon excitation (Coherent, Chameleon  
21 Vision II). Fluorescent images were captured at ~6 Hz with emissions at 460 $\pm$ 25 nm for CB,  
22 525 $\pm$ 25 nm for CGD and 605 $\pm$ 35 nm for TRITC-dextran.

23

24 **In situ hybridization.** Cervical dislocation of the anesthetized mouse was performed and  
25 the tongue extracted. The dissected mouse tongue was directly dropped in liquid N<sub>2</sub> for  
26 instant freezing. The frozen tongue was embedded in an optimal cutting temperature (OCT)  
27 compound block and kept overnight at -80 °C in a deep freezer. The following day, the OCT  
28 block was moved to a -20 °C freezer for one hour and cryosectioned into 10- $\mu$ m-thick  
29 sections. The in situ hybridization was carried out in compliance with the RNAscope  
30 procedure. The accession numbers for the mRNAs used in this study is as follows: T1R1  
31 (NM\_031867.2), T1R2 (NM\_031873.1) and T1R3 (NM\_031872.2).

32

33 **Statistical analysis.** We used MATLAB software for statistical analyses. Paired or unpaired  
34 t-tests (two-sided) were used for group comparisons by assuming normality based on  
35 previous literatures. Neither randomization nor blinding was applied. For regression analyses,  
36 we presented correlation coefficient ( $R^2$ ) along with the sample size. The data was presented

1 as the mean  $\pm$  standard error. We considered  $p$ -values less than 0.01 to be statistically  
2 significant.

3

4 **Code availability.** The Matlab codes used for the simulation studies are available from the  
5 corresponding author upon reasonable request for purposes of academic research.

6

7 **Data availability.** All relevant data are available from the corresponding author upon  
8 reasonable request.

9

10

## 11 REFERENCES

12

13 Barretto, R.P.J., Gillis-Smith, S., Chandrashekar, J., Yarmolinsky, D.A., Schnitzer, M.J.,  
14 Ryba, N.J.P., and Zuker, C.S. (2015). The neural representation of taste quality at the  
15 periphery. *Nature* 517, 373–376.

16 Beaurepaire, E., and Mertz, J. (2002). Epifluorescence collection in two-photon microscopy.  
17 *Appl. Opt.* 41, 5376–5382.

18 Bouchard, M.B., Voleti, V., Mendes, C.S., Lacefield, C., Grueber, W.B., Mann, R.S., Bruno,  
19 R.M., and Hillman, E.M.C. (2015). Swept confocally-aligned planar excitation (SCAPE)  
20 microscopy for high-speed volumetric imaging of behaving organisms. *Nat. Photonics* 9,  
21 113–119.

22 Caicedo, A., Kim, K., and Roper, S.D. (2002). Individual mouse taste cells respond to  
23 multiple chemical stimuli. *J. Physiol.* 544, 501–509.

24 Chandrashekar, J., Hoon, M.A., Ryba, N.J.P., and Zuker, C.S. (2006). The receptors and  
25 cells for mammalian taste. *Nature* 444, 288–294.

26 Chandrashekar, J., Kuhn, C., Oka, Y., Yarmolinsky, D.A., Hummler, E., Ryba, N.J.P., and  
27 Zuker, C.S. (2010). The cells and peripheral representation of sodium taste in mice. *Nature*  
28 464, 297–301.

29 Chaudhari, N., and Roper, S.D. (2010). The cell biology of taste. *J. Cell Biol.* 190, 285–296.

30 Chen, X., Gabitto, M., Peng, Y., Ryba, N.J., and Zuker, C.S. (2011). A gustotopic map of  
31 taste qualities in the mammalian brain. *Science* 333, 1262–1266.

32 Choi, M., Lee, W.M., and Yun, S.H. (2015). Intravital microscopic interrogation of peripheral  
33 taste sensation. *Sci. Rep.* 5, 8661.

34 Clark, A.A., Liggett, S.B., and Munger, S.D. (2012). Extraoral bitter taste receptors as  
35 mediators of off-target drug effects. *FASEB J.* 26, 4827–4831.

36 Dando, R., and Roper, S.D. (2009). Cell-to-cell communication in intact taste buds through  
37 ATP signalling from pannexin 1 gap junction hemichannels. *J. Physiol.* 587, 5899–5906.

38 Danilova, V. (2003). glossopharyngeal nerves to taste stimuli in C57BL / 6J mice. *BME*  
39 *Neurosci.* 15, 1–15.

40 Dvoryanchikov, G., Huang, Y.A., Barro-soria, R., Chaudhari, N., and Roper, S.D. (2011).  
41 GABA, Its Receptors, and GABAergic Inhibition in Mouse Taste Buds. *J. Neurosci.* 31,  
42 5782–5791.

- 1 Finger, T.E. (2005). ATP Signaling Is Crucial for Communication from Taste Buds to  
2 Gustatory Nerves. *Science* 310, 1495–1499.
- 3 Heyer, B.R., Taylor-burds, C.C., Mitzelfelt, J.D., Delay, E.R., and Program, N. (2004).  
4 Monosodium Glutamate and Sweet Taste : Discrimination between the Tastes of Sweet  
5 Stimuli and Glutamate in Rats. *Chem. Senses* 29, 721–729.
- 6 Holland, V.F., Zampighi, G.A., Simon, S.A. (1991). No Tight junctions in taste buds:  
7 possible role in perception of intravascular gustatory stimuli. *Chem. Senses* 16, 69–79.
- 8 Huang, Y.A., Dando, R., and Roper, S.D. (2009). Autocrine and Paracrine Roles for ATP  
9 and Serotonin in Mouse Taste Buds. *J. Neurosci.* 29, 13909–13918.
- 10 Katona, G., Szalay, G., Maák, P., Kaszás, A., Veress, M., Hillier, D., Chiovini, B., Vizi, E.S.,  
11 Roska, B., and Rózsa, B. (2012). Fast two-photon in vivo imaging with three-dimensional  
12 random-access scanning in large tissue volumes. *Nat. Methods* 9, 201–208.
- 13 Kim, M.R., Kusakabe, Y., Miura, H., Shindo, Y., Ninomiya, Y., and Hino, A. (2003). Regional  
14 expression patterns of taste receptors and gustducin in the mouse tongue. *Biochem.*  
15 *Biophys. Res. Commun.* 312, 500–506.
- 16 Lee, H., Macpherson, L.J., Parada, C.A., Zuker, C.S., and Nicholas, J.P. (2017). Rewiring  
17 the taste system. *Nature* 548, 330–333.
- 18 Liman, E.R., Zhang, Y. V., and Montell, C. (2014). Peripheral coding of taste. *Neuron* 81,  
19 984–1000.
- 20 Lindemann, B. (2001). Receptors and transduction in taste. *Nature* 413, 219–225.
- 21 Nelson, G., Hoon, M.A., Chandrashekar, J., Zhang, Y., Ryba, N.J.P., and Zuker, C.S. (2001).  
22 Mammalian Sweet Taste Receptors insight to our understanding of chemosensory discrimi-  
23 nation and coding. Recently, we described the isolation of two novel families of G protein-  
24 coupled receptors. *Cell* 106, 381–390.
- 25 Nguyen, J.P., Shipley, F.B., Linder, A.N., Plummer, G.S., Shaevitz, J.W., and Leifer, A.M.  
26 (2016). Whole-brain calcium imaging with cellular resolution in freely behaving *C. elegans*.  
27 *Proc. Natl. Acad. Sci.* 113, E1074–E1081.
- 28 Ohmoto, M., Ma, Z., Dvoryanchikov, G., Li, A., Adrien, L., Zhao, H., Leung, S., Abernethy, M.,  
29 Koppel, J., Davies, P., et al. (2013). CALHM1 ion channel mediates purinergic  
30 neurotransmission of sweet, bitter and umami tastes. *Nature* 495, 223–226.
- 31 Oka, Y., Butnaru, M., von Buchholtz, L., Ryba, N.J.P., and Zuker, C.S. (2013). High salt  
32 recruits aversive taste pathways. *Nature* 494, 472–475.
- 33 Roper, S.D. (2006). Cell communication in taste buds. *Cell. Mol. Life Sci.* 63, 1494–1500.
- 34 Roper, S.D., and Chaudhari, N. (2017). Taste buds: Cells, signals and synapses. *Nat. Rev.*  
35 *Neurosci.* 18, 485–497.
- 36 Shih, A.Y., Driscoll, J.D., Drew, P.J., Nishimura, N., Schaffer, C.B., and Kleinfeld, D. (2012).  
37 Two-photon microscopy as a tool to study blood flow and neurovascular coupling in the  
38 rodent brain. *J. Cereb. Blood Flow Metab.* 32, 1277–1309.
- 39 Song, A., Charles, A.S., Koay, S.A., Gauthier, J.L., Thiberge, S.Y., Pillow, J.W., and Tank,  
40 D.W. (2017). Volumetric two-photon imaging of neurons using stereoscopy (vtwins). *Nat.*  
41 *Methods* 14, 420–426.
- 42 Szydlowska, K., and Tymianski, M. (2010). Calcium, ischemia and excitotoxicity. *Cell*  
43 *Calcium* 47, 122–129.
- 44 Thestrup, T., Litzlbauer, J., Bartholomäus, I., Mues, M., Russo, L., Dana, H., Kovalchuk, Y.,  
45 Liang, Y., Kalamakis, G., Laukat, Y., et al. (2014). Optimized ratiometric calcium sensors for

- 1 functional in vivo imaging of neurons and T lymphocytes. *Nat. Methods* *11*, 175–182.
- 2 Tomchik, S.M., Berg, S., Kim, J.W., Chaudhari, N., and Roper, S.D. (2007). Breadth of  
3 Tuning and Taste Coding in Mammalian Taste Buds. *J. Neurosci.* *27*, 10840–10848.
- 4 Vandenberg, A., and Kinnamon, S.C. (2016). Glutamate: Tastant and Neuromodulator in  
5 Taste Buds. *Adv. Nutr. An Int. Rev. J.* *7*, 823S–827S.
- 6 Wang, F., Flanagan, J., Su, N., Wang, L.C., Bui, S., Nielson, A., Wu, X., Vo, H.T., Ma, X.J.,  
7 and Luo, Y. (2012). RNAscope: A novel in situ RNA analysis platform for formalin-fixed,  
8 paraffin-embedded tissues. *J. Mol. Diagnostics* *14*, 22–29.
- 9 Wu, A., Dvoryanchikov, G., Pereira, E., Chaudhari, N., and Roper, S.D. (2015). Breadth of  
10 tuning in taste afferent neurons varies with stimulus strength. *Nat. Commun.* *6*, 1–11.
- 11 Yarmolinsky, D.A., Zuker, C.S., and Ryba, N.J.P. (2009). Review Common Sense about  
12 Taste : From Mammals to Insects. *Cell* *139*, 234–244.
- 13 Yoshida, R., Shigemura, N., Sanematsu, K., Yasumatsu, K., Ishizuka, S., and Ninomiya, Y.  
14 (2006). Taste Responsiveness of Fungiform Taste Cells With Action Potentials. *J.*  
15 *Neurophysiol.* *96*, 3088–3095.
- 16 Yoshida, R., Ohkuri, T., Jyotaki, M., Yasuo, T., Horio, N., Yasumatsu, K., Sanematsu, K.,  
17 Shigemura, N., Yamamoto, T., Margolskee, R.F., et al. (2010). Endocannabinoids selectively  
18 enhance sweet taste. *Proc. Natl. Acad. Sci.* *107*, 935–939.
- 19 Zhao, G.Q., Zhang, Y., Hoon, M.A., Chandrashekar, J., Erlenbach, I., Ryba, N.J.P., and  
20 Zuker, C.S. (2003). The receptors for mammalian sweet and umami taste. *Cell* *115*, 255–  
21 266.
- 22 Zuker, C.S. (2015). Food for the brain. *Cell* *161*, 9–11.
- 23

## Figures

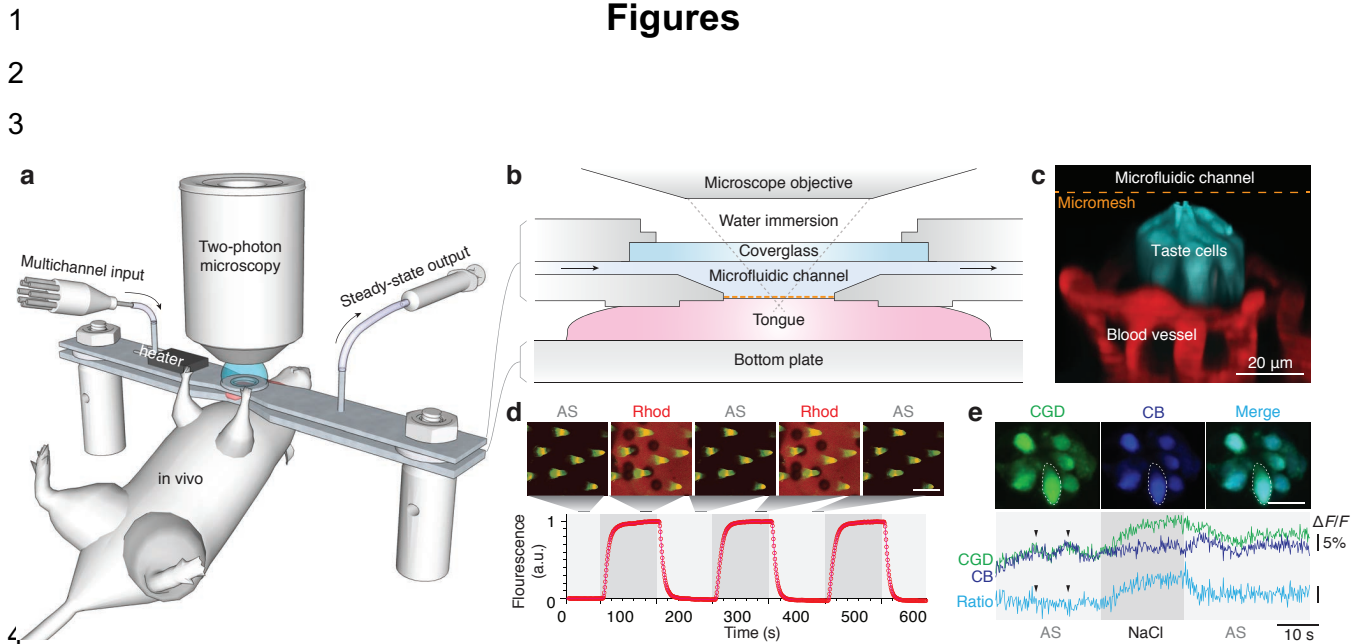

**5 Figure 1 | Microfluidics-on-a-tongue platform.** (a) A schematic diagram. The tongue of the  
 6 anesthetized mouse was mounted on the microfluidics-on-a-tongue device. Various liquid-  
 7 phase tastants were delivered through a multichannel input controlled by a computerized  
 8 fluidic system, while the taste bud was imaged using a two-photon microscope. (b) A cross-  
 9 sectional view of the imaging chamber. Arrows indicate the direction of fluidic stimuli. The  
 10 orange dashed line indicates the micromesh used to minimize the movement of artifact  
 11 during fluidic switching. (c) A 3-dimensional fluorescent micrograph of the taste bud. The  
 12 taste cells in cyan were co-labeled with calcium-green dextran (CGD) and cascade blue  
 13 (CB). The blood vessel in red was labeled with an intravenous rhodamine-dextran. (d)  
 14 Characterization of the microfluidic system. The dorsal surface of the tongue was serially  
 15 imaged with alternating inputs of artificial saliva (AS) and fluorescent rhodamine (Rhod). The  
 16 cone-shaped filiform papillae (green) were made visible by keratin autofluorescence. The  
 17 fluorescent traces were fitted to exponential curves. Scalebar, 100  $\mu\text{m}$ . (e) Ratiometric  
 18 calcium imaging. Taste cells loaded with both a calcium-sensitive dye (CGD) and a calcium-  
 19 insensitive dye (CB) were imaged at  $\sim 6$  Hz with salty taste stimulus (400 mM NaCl). Note  
 20 that ratiometric analysis effectively eliminates the artefactual fluctuations (arrowheads) while  
 21 preserving the taste-evoked calcium response. Scalebar, 20  $\mu\text{m}$ .

22

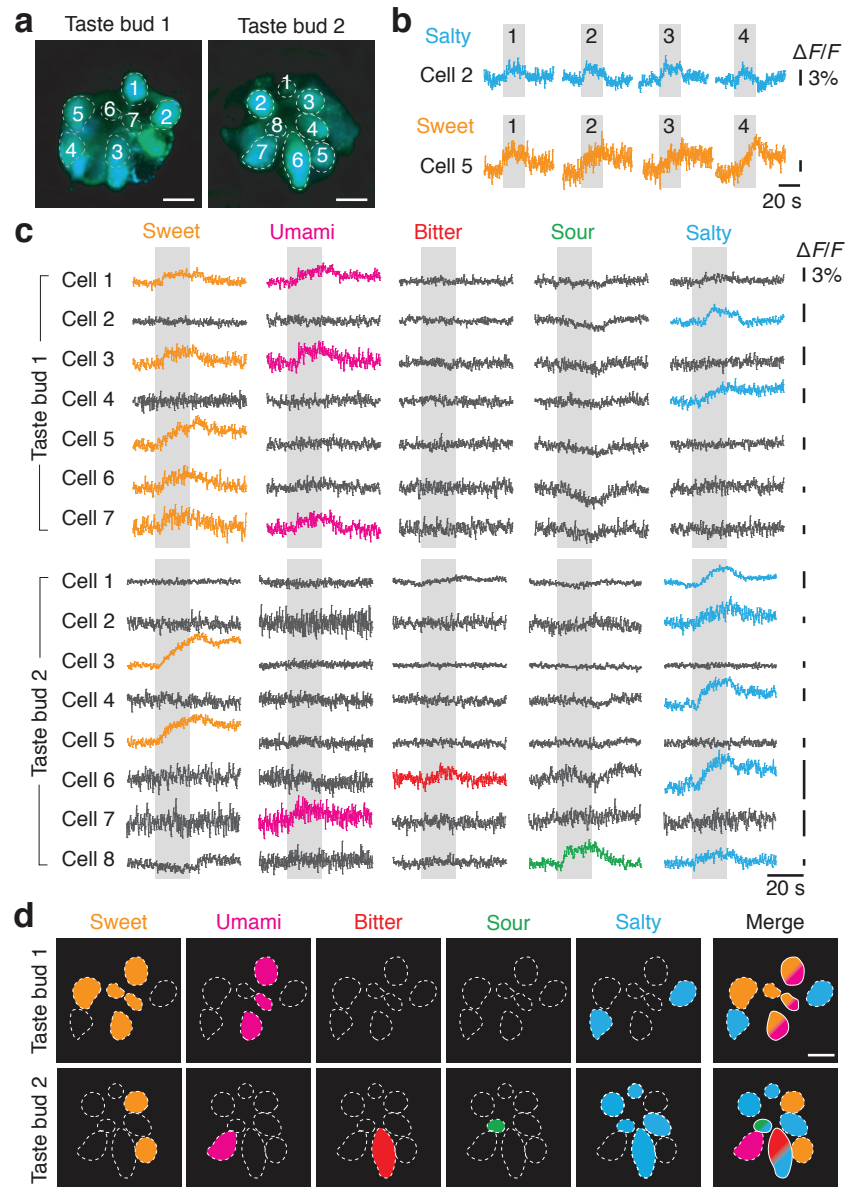

1  
2 **Figure 2 | Comprehensive functional mapping of the fungiform taste buds *in vivo*.** (a)  
3 Fluorescence images of the taste buds loaded with the ratiometric dyes. Dashed lines  
4 demarcate each numbered taste cell. Scalebar, 30  $\mu\text{m}$ . (b) Repeatability of taste-evoked  
5 calcium response. In taste bud 1, cells 2 and 5 repeatedly responded four times to salty (400  
6 mM NaCl) and sweet (40 mM acesulfame potassium) stimuli, respectively. The shaded  
7 regions represent the duration of the taste stimuli. (c) Calcium response of each taste cell to  
8 the five basic taste stimuli. Each trace is the average of repeated trials. Colored traces are  
9 classified as “responsive” ( $p < 0.01$ ). (d) Taste map. For each taste quality, responsive cells  
10 from the calcium traces in (c) were colored. In the merged image, single-colored and dual-  
11 colored cells represent single-tuned and dual-tuned cells, respectively. Scalebar, 10  $\mu\text{m}$ .

12  
13

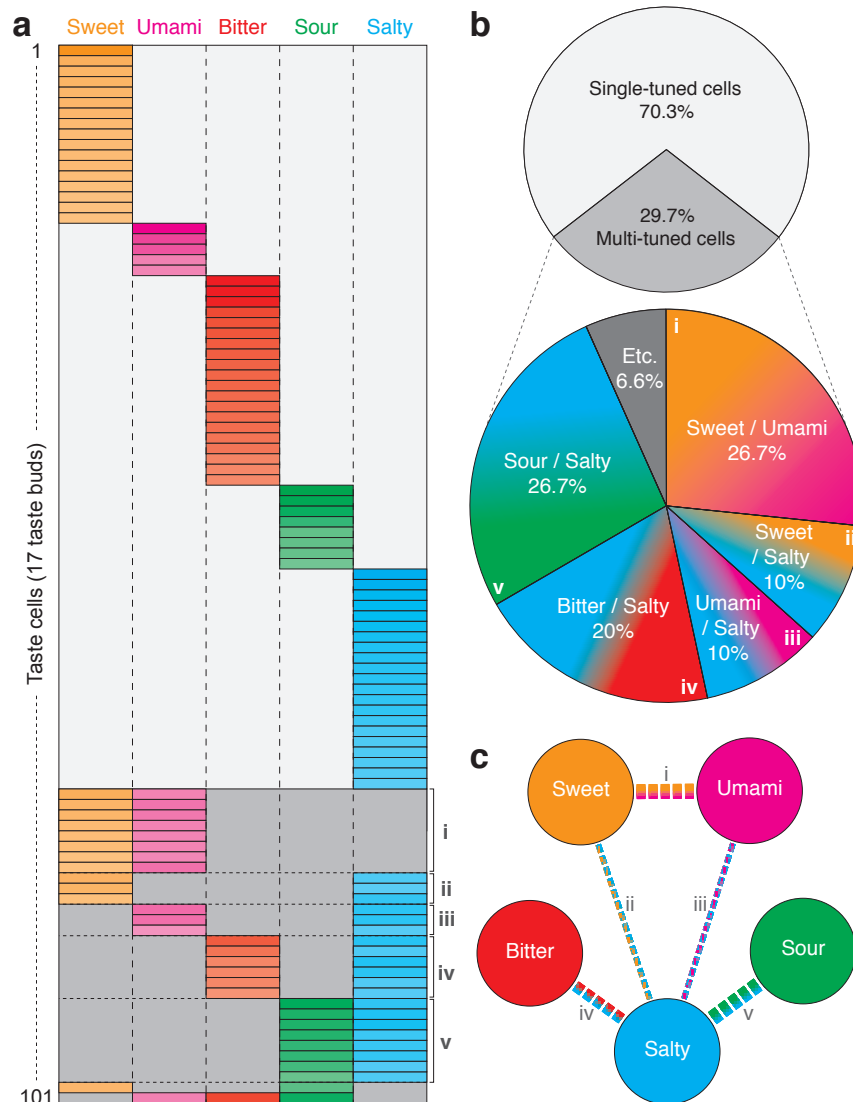

1  
2 **Figure 3 | Tuning of fungiform taste cells.** (a) Summary of taste-evoked cellular  
3 responses. Each row represents a taste cell (101 cells from 17 taste buds) while each  
4 colored region indicates the statistically significant calcium responses from 4 repeated trials  
5 ( $p < 0.01$ ). The color intensity represents the magnitude of the calcium response ( $\Delta F/F$ ). (b)  
6 Summary statistics of taste-evoked cellular responses. Note that 30% of taste cells were  
7 multi-tuned cells, with most of them being dual-tuned. (c) Graphical representation of  
8 connectivity among the five basic tastes. Thicknesses of the edges indicate strengths of the  
9 connectivity. Note that sweet and umami show a strong connection while salty is connected  
10 with all the other taste qualities.

11



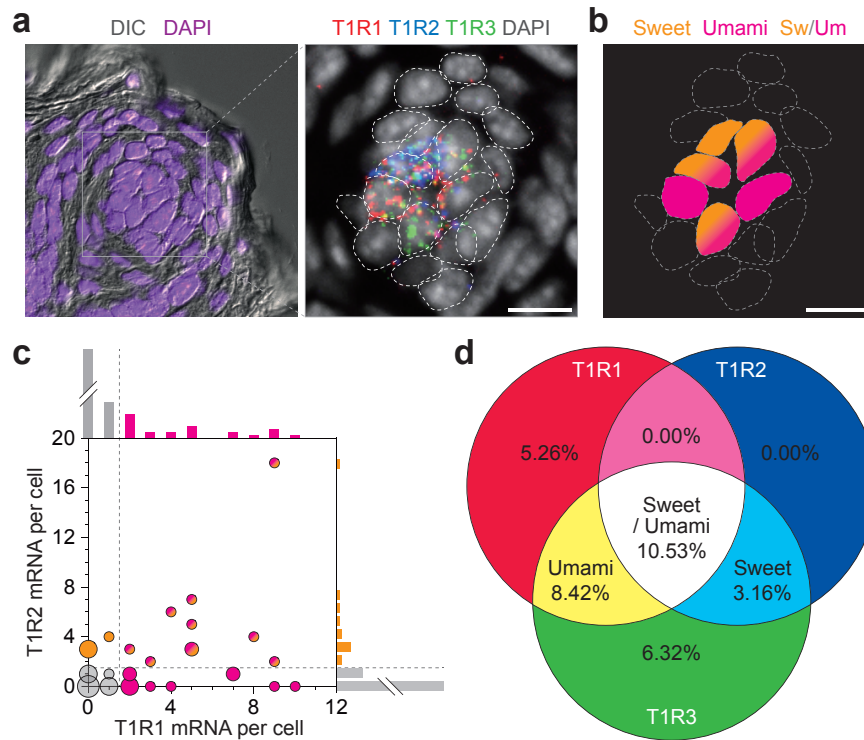

1  
2 **Figure 4 | Transcriptional verification of sweet-umami cells.** (a) Triple-color fluorescent  
3 *in situ* hybridization of T1R family (T1R1, T1R2 and T1R3). Differential interference contrast  
4 (DIC) and nuclear stain (DAPI) were imaged to delineate the margins for cells and the  
5 nucleus. On the right panel, each fluorescent dot represents a single mRNA of T1R1 (red),  
6 T1R2 (blue), or T1R3 (green), with each nuclear margin demarcated with dashed lines.  
7 Scalebar, 10  $\mu$ m. (b) Map of sweet (T1R2/T1R3) and umami (T1R1/T1R3) cells based on  
8 mRNA profile. Scalebar, 10  $\mu$ m. (c) Single-cell mRNA expression for T1R1 and T1R2 (n = 95  
9 cells). The relative size of the circle represents the number of cells. Dashed lines indicate the  
10 threshold level, corresponding to “>1 mRNA per cell”. (d) Venn diagram of T1Rs  
11 transcriptome. Note that ~10% of taste cells transcribe to both sweet and umami receptors,  
12 consistent with our functional screening shown in Fig. 3.

13

## Supplementary Data

| Tastant           | Concentration ( <i>c</i> ) | Refractive index ( <i>n</i> ) | $dn/dc$ ( $10^{-3} \text{ M}^{-1}$ ) |
|-------------------|----------------------------|-------------------------------|--------------------------------------|
| Artificial saliva | -                          | 1.333                         | -                                    |
| Quinine           | 5 mM                       | 1.334                         | 93.27                                |
| AceK              | 40 mM                      | 1.334                         | 24.03                                |
| Citric acid       | 10 mM                      | 1.333                         | 23.49                                |
| NaCl              | 400 mM                     | 1.336                         | 9.30                                 |
| MPG               | 100 mM                     | 1.336                         | 24.66                                |

**Supplementary Table 1 | Optical characterization of tastants.** Tastants were prepared in artificial saliva and refractive indices were measured at room temperature by a digital refractometer (ORD 85BM, Kern & Sohn). The specific refractive index increment ( $dn/dc$ ) was determined by a linear-fit to data measured at five different concentrations.

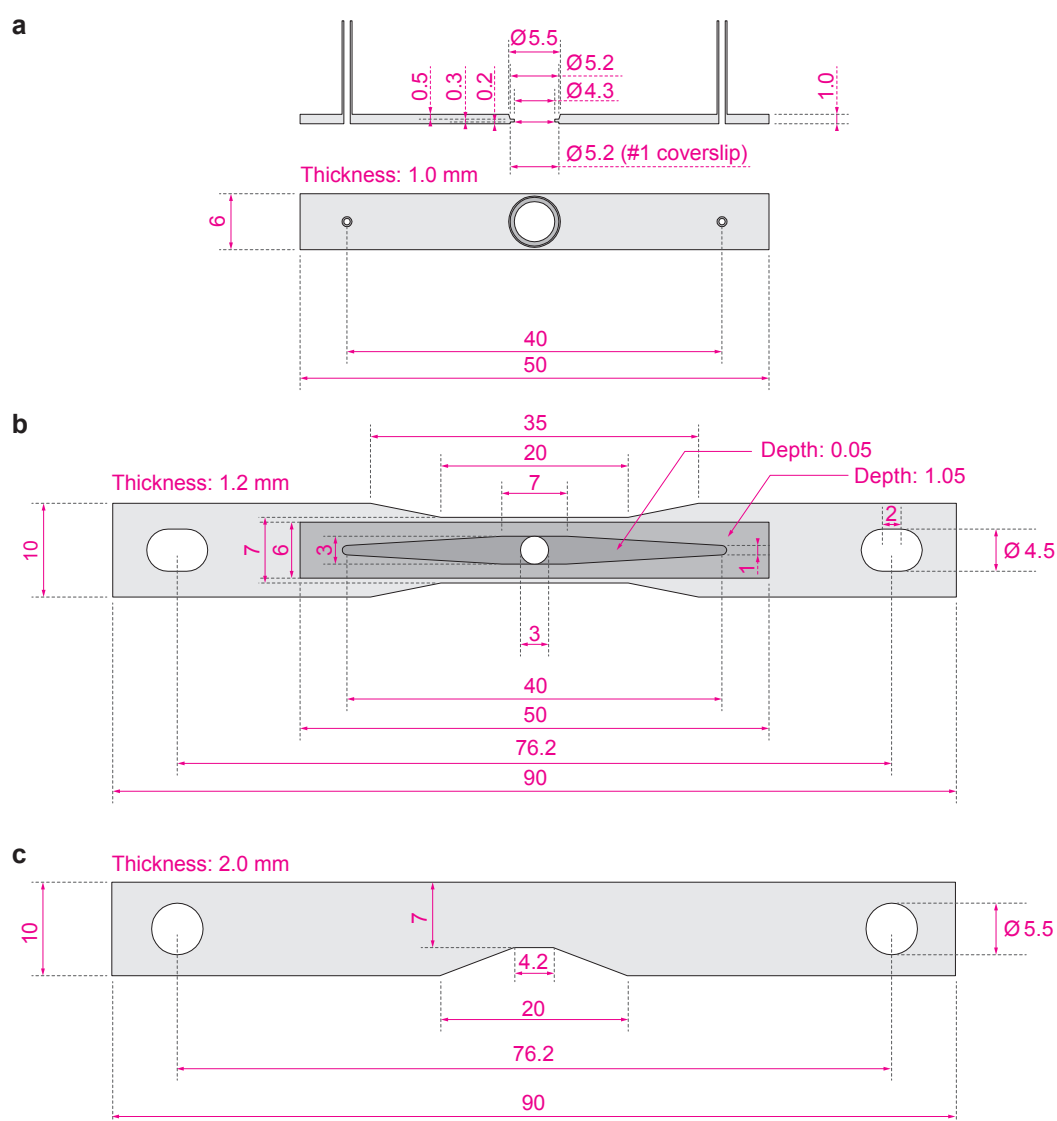

**Supplementary Fig. 1 | A detail drawing of a microfluidics-on-a-tongue device.** (a) The upper piece for the top unit. It contains two connectors, one for multi-channel input and the other for output drainage. The open window is designed for mounting a coverslip with 5 mm in diameter and 0.15 mm in thickness. (b) The lower piece for the top unit, containing a fluidic channel and two thru-holes. The circular opening at the center of the channel is sealed when interfaced with the mouse tongue. (c) The bottom unit for gluing the tongue. All numbers without units are in mm.

**a**

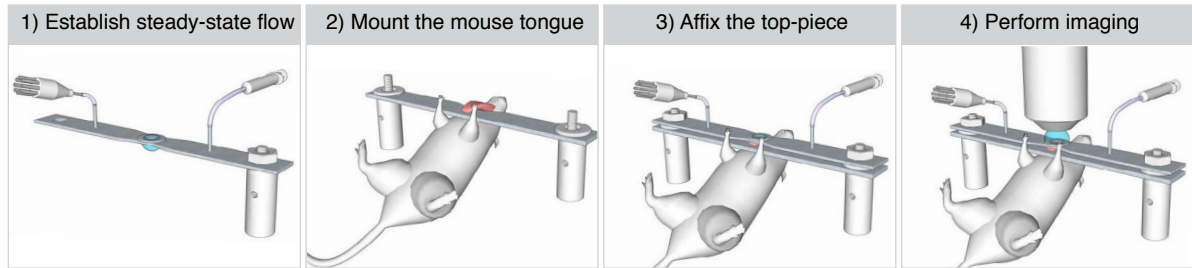

**b**

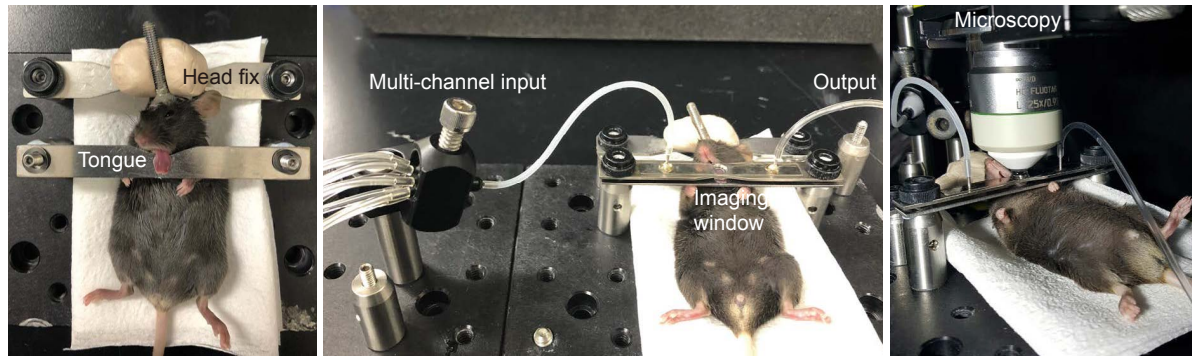

**Supplementary Fig. 2 | A step-by-step protocol for the preparation of functional taste cell imaging *in vivo*.** (a) Mounting procedure. A microfluidic chamber is connected to the multi-channel input and the output to obtain quasi-steady-state flow (step 1). The ventral part of the tongue is glued onto the bottom plate (step 2). The top piece is placed on the dorsum of the tongue. The height is adjusted to ensure physiologic blood flow (step 3). Functional *in vivo* imaging on taste cells is performed under two-photon microscope (step 4). Detailed procedures are described in Online Methods. (b) Photographs of the preparations in (a). Left, the mouse tongue is attached to the bottom plate (left). Fluidic control system is assembled and mounted on the mouse tongue (middle). The preparation is mounted on an imaging system (right).

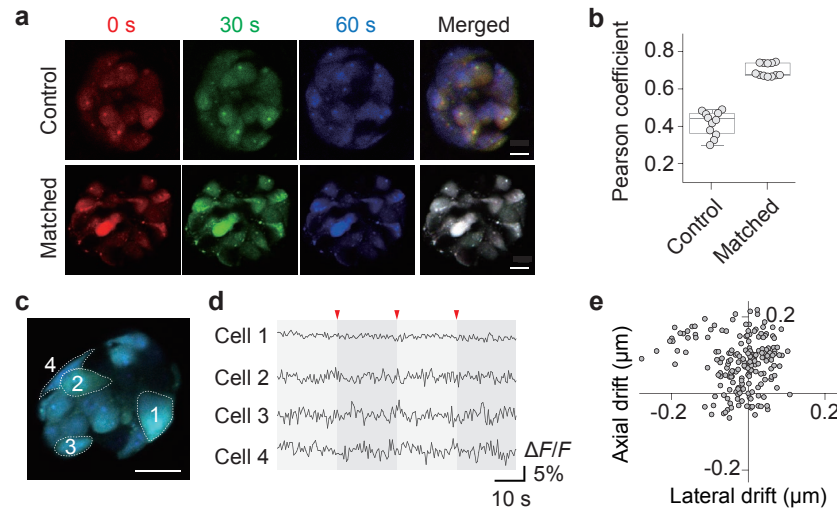

**Supplementary Fig. 3 | Imaging stability.** (a) Time-series fluorescent imaging of a fungiform taste bud. The top row was acquired without matching input and output fluidics (control) and the bottom row was acquired after attaining quasi-steady-state flow (stabilized). Fluorescent intensity is pseudo-colored to highlight motion artifact in the merged image (the white color in the merged image represents no motion). Scalebar, 5  $\mu\text{m}$ . (b) Motion artifact quantified by Pearson's correlation coefficient of time-series images in (a). (c,d) Representative cellular calcium traces with switching fluidic channels (indicated by arrows). Scalebar, 10  $\mu\text{m}$ . (e) Quantification of lateral and axial drifts of fungiform taste bud over 80 s. Each point indicates distance calculated from the first frame marked as an origin of the coordinates<sup>2</sup>.

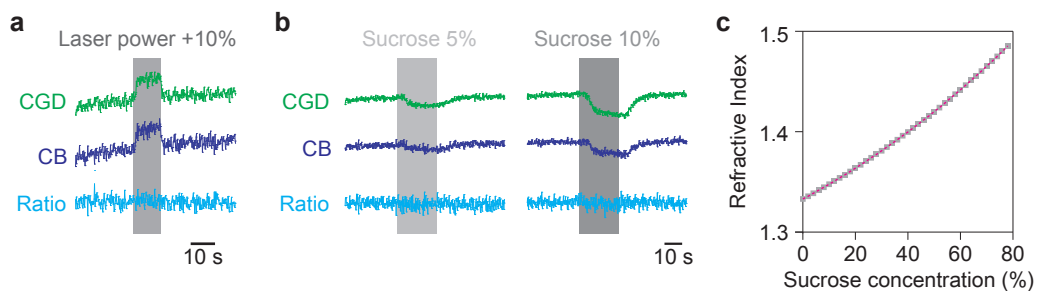

**Supplementary Fig. 4 | Verification of ratiometric analysis.** (a) Ratiometric correction of laser fluctuation. Laser power was increased by 10% for duration of 10 s (indicated by gray). Note that ratiometric analysis effectively removed the artifact. (b) Ratiometric correction of tastant-induced optical artifact. Intensity fluctuation by introducing sucrose solution (5% and 10%) in a fluidic system was effectively corrected by the ratiometric analysis. (c) Refractive indices of sucrose solution in different concentration.

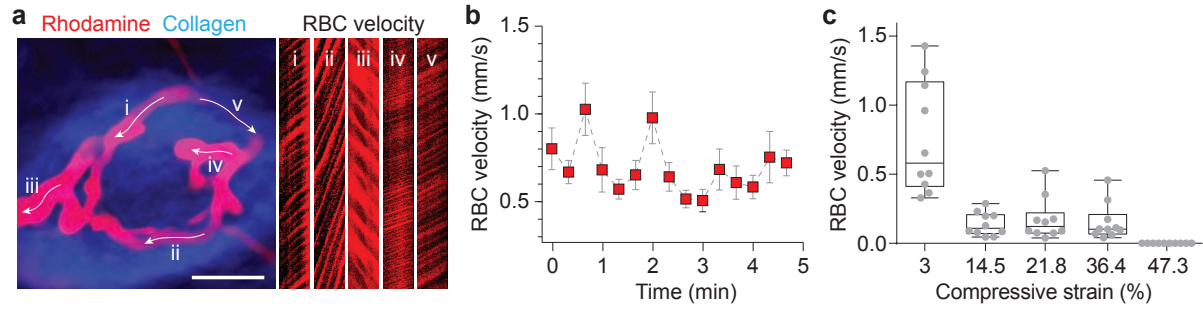

**Supplementary Fig. 5 | Characteristic of blood perfusion.** (a) Quantification of blood flow. Rhodamine-B dextran (70 kDa) was intravenously injected and a fungiform taste bud was imaged by two-photon microscopy. The arrows indicate direction of the blood flow. RBC velocity was measured by the line scanning for each vascular segment ( $x = 20 \mu\text{m}$ ,  $t = 150 \text{ms}$ ). i:  $0.43 \pm 0.09 \text{ mm/s}$ , ii:  $0.25 \pm 0.05 \text{ mm/s}$ , iii:  $0.727 \pm 0.13 \text{ mm/s}$ , iv:  $1.28 \pm 0.19 \text{ mm/s}$ , v:  $1.13 \pm 0.21 \text{ mm/s}$  ( $n = 10$  measurements). Scalebar,  $30 \mu\text{m}$ . (b) Time-series measurement of blood flow. (c) Blood flow with respect to compressive strain. Strain is calculated based on the measured thickness of the mouse tongue ( $1.65 \pm 0.06 \text{ mm}$ ).

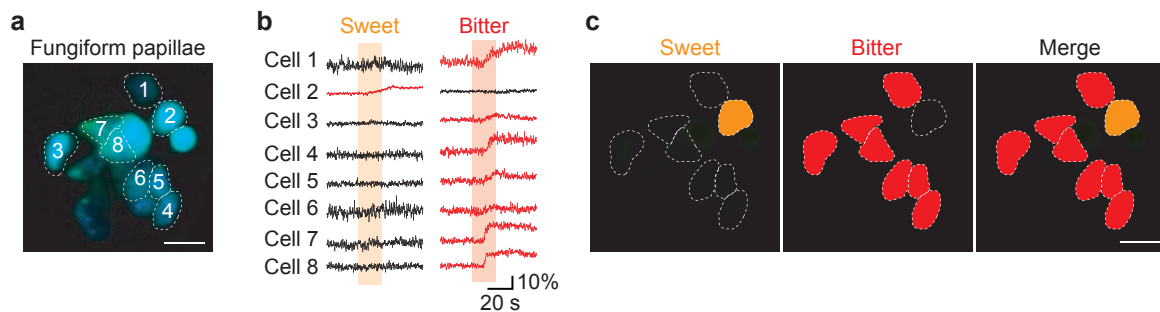

**Supplementary Fig. 6 | A bitter-tuned taste bud.** (a,b) Functional activity of a bitter-tuned taste bud. Calcium responses to sweet and bitter tastants are shown (no activity observed in salty, sour, and umami). Note that 7 out of 8 taste cells responded to bitter. (c) A taste map for (a). Scalebar,  $10 \mu\text{m}$ .
